# Supplementary material
Source: ML conference proceedings conference paper supplement (https://openaccess.thecvf.com/content/ICCV_2017/html/Wang_Efficient_Low_Rank_ICCV_2017_paper.html)
Supplement: Supplementary file 1 [file Wang_Efficient_Low_Rank_ICCV_2017_supplemental.pdf]

# Efficient Low Rank Tensor Ring Completion Supplementary Material

Wenqi Wang, Vaneet Aggarwal  
Purdue University, West Lafayette, IN  
{wang2041, vaneet } @purdue.edu

Shuchin Aeron  
Tufts University, Medford, MA  
shuchin@ece.tufts.edu

## 1. Supplementary Material

### 1.1. Proof of Lemma 1

*Proof.* Based on definition of tensor permutation in Definition 6, on the left hand side, the  $(j_1, \dots, j_n)$  entry of the tensor is

$$\mathcal{X}^{P_i}(j_1, \dots, j_n) = \mathcal{X}(j_{n-i+2}, \dots, j_n, j_1, \dots, j_{n-i+1}). \quad (1)$$

On the right hand side, the  $(j_1, \dots, j_n)$  entry of the tensor gives

$$\begin{aligned} & f(\mathcal{U}_i \cdots \mathcal{U}_{i-1})(j_1, \dots, j_n) \\ &= \text{Trace}(\mathcal{U}_i(:, j_1, :) \mathcal{U}_{i+1}(:, j_2, :) \cdots \mathcal{U}_n(:, j_{n-i+1}, :) \\ & \quad \mathcal{U}_1(:, j_{n-i+2}, :) \cdots \mathcal{U}_{i-1}(:, j_n, 1)). \end{aligned} \quad (2)$$

Since trace is invariant under cyclic permutations, we have

$$\begin{aligned} & \text{Trace}(\mathcal{U}_i(:, j_1, :) \mathcal{U}_{i+1}(:, j_2, :) \cdots \mathcal{U}_n(:, j_{n-i+1}, :) \\ & \quad \mathcal{U}_1(:, j_{n-i+2}, :) \cdots \mathcal{U}_{i-1}(:, j_n, :)) \\ &= \text{Trace}(\mathcal{U}_1(:, j_{n-i+2}, :) \cdots \mathcal{U}_{i-1}(:, j_n, :) \\ & \quad \mathcal{U}_i(:, j_1, :) \mathcal{U}_{i+1}(:, j_2, :) \cdots \mathcal{U}_n(:, j_{n-i+1}, :)) \\ &= f(\mathcal{U}_1 \cdots \mathcal{U}_n)(j_{n-i+2}, \dots, j_n, j_1, \dots, j_{n-i+1}), \end{aligned} \quad (3)$$

which equals to the right hand side of equation (1). Since any entries in  $\mathcal{X}^{P_i}$  are the same as those in  $\mathcal{U}_i \mathcal{U}_{i+1} \cdots \mathcal{U}_n \mathcal{U}_1 \cdots \mathcal{U}_{i-1}$ , the claim is proved.  $\square$

### 1.2. Proof of Lemma 2

*Proof.* First we note that tensor permutation does not change tensor Frobenius norm as all the entries remain the same as those before the permutation. In Lemma 2, we have

$$\mathcal{U}_i = \underset{\mathcal{Y}}{\text{argmin}} \| \mathcal{P}_\Omega \circ f(\mathcal{U}_1 \cdots \mathcal{U}_{i-1} \mathcal{Y} \mathcal{U}_{i+1} \cdots \mathcal{U}_n) - \mathcal{X}_\Omega \|_F^2. \quad (4)$$

Since the permutation operation does not change the Frobenius norm, equivalently we have

$$\mathcal{U}_i = \underset{\mathcal{Y}}{\text{argmin}} \| \mathcal{P}_\Omega^{P_i} \circ (f(\mathcal{U}_1 \cdots \mathcal{U}_{i-1} \mathcal{Y} \mathcal{U}_{i+1} \cdots \mathcal{U}_n))^{P_i} - \mathcal{X}_\Omega^{P_i} \|_F^2. \quad (5)$$

Based on Lemma 1, we have

$$(f(\mathcal{U}_1 \cdots \mathcal{U}_{i-1} \mathcal{Y} \mathcal{U}_{i+1} \cdots \mathcal{U}_n))^{P_i} = f(\mathcal{Y} \mathcal{U}_{i+1} \cdots \mathcal{U}_n \mathcal{U}_1 \cdots \mathcal{U}_{i-1}), \quad (6)$$

thus equation (5) becomes

$$\mathcal{U}_i = \underset{\mathcal{Y}}{\text{argmin}} \| \mathcal{P}_\Omega^{P_i} \circ f(\mathcal{Y} \mathcal{U}_{i+1} \cdots \mathcal{U}_n \mathcal{U}_1 \cdots \mathcal{U}_{i-1}) - \mathcal{X}_\Omega^{P_i} \|_F^2. \quad (7)$$

Thus we prove our claim.  $\square$
